# Supplementary material
Source: PubMed Central journal article supplement (PMC5497761)
Supplement: NIHMS868628-supplement.pdf [file NIHMS868628-supplement.pdf]

**Appendix**  
**Surveillance of Youth Physical Activity and Sedentary Behavior With Wrist Accelerometry**  
**Kim et al.**

**Appendix Table 1.** Cutpoints of GGIR, Crouter, and Chandler Methods for Classifying Different Intensity Categories

| <b>Cutpoints</b>   | <b>GGIR (mg)</b>      | <b>CrouterVA</b>                   | <b>CrouterVM</b>        | <b>ChandlerVA</b>                     | <b>ChandlerVM</b>          |
|--------------------|-----------------------|------------------------------------|-------------------------|---------------------------------------|----------------------------|
| Sedentary behavior | $mg \leq 32.9$        | $\text{Counts}/5s \leq 35$         | $VM/5s \leq 100$        | $\text{Counts}/5s \leq 161$           | $VM/5s \leq 305$           |
| Light              | $32.9 < mg \leq 370$  | $35 < \text{Counts}/5s \leq 360$   | $100 < VM/5s \leq 609$  | $162 \leq \text{Counts}/5s \leq 529$  | $306 \leq VM/5s \leq 817$  |
| Moderate           | $370 < mg \leq 707.0$ | $360 < \text{Counts}/5s \leq 1129$ | $609 < VM/5s \leq 1809$ | $530 \leq \text{Counts}/5s \leq 1461$ | $818 \leq VM/5s \leq 1968$ |
| Vigorous           | $mg > 707.0$          | $\text{Counts}/5s > 1129$          | $VM/5s > 1809$          | $\text{Counts}/5s \geq 1462$          | $VM/5s \geq 1969$          |

ChandlerVA, Chandler method using vertical axis counts; ChandlerVM, Chandler method using vector magnitudes; CrouterVA, Crouter method using vertical axis counts; CrouterVM, Crouter method using vector magnitude; VM, Vector magnitude

**Appendix**  
**Surveillance of Youth Physical Activity and Sedentary Behavior With Wrist Accelerometry**  
**Kim et al.**

**Appendix Figure 1.** Comparisons of five different processing techniques for sedentary behavior (SB) by gender and age groups.

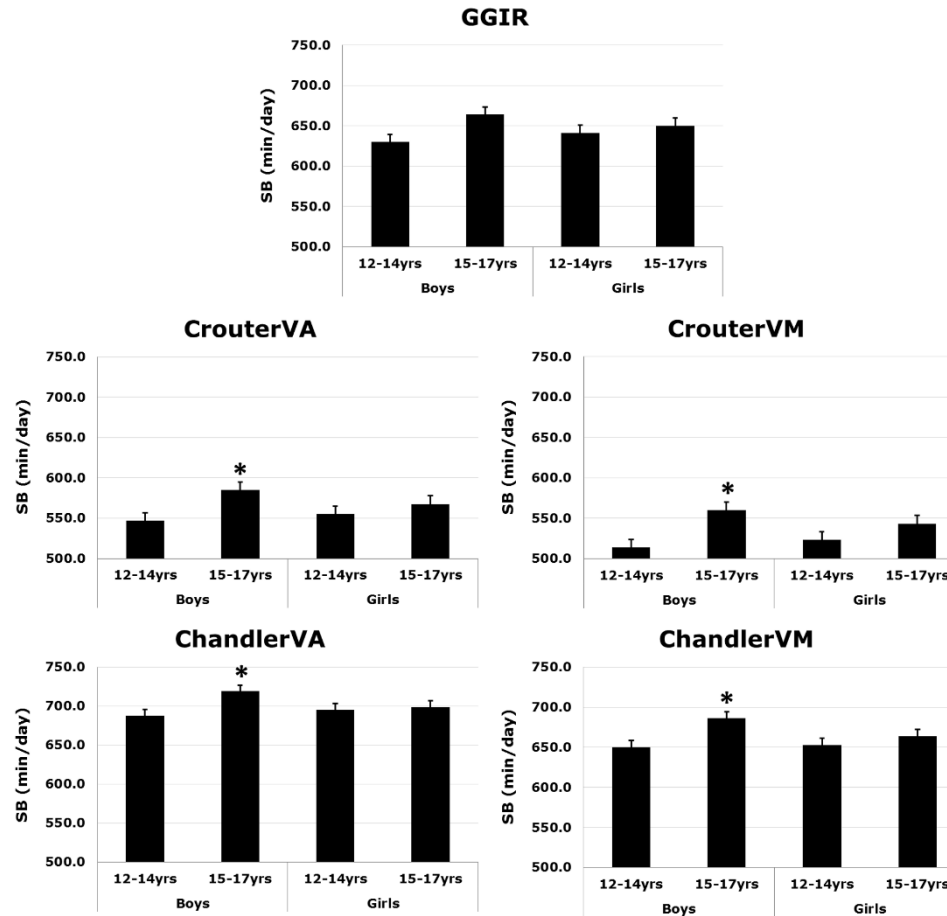

*Note:* An asterisk (\*) indicates significant differences between younger (12-14 years) and older (15-17 years) boys.

ChandlerVA, Chandler method using vertical axis counts; ChandlerVM, Chandler method using vector magnitudes; CrouterVA, Crouter method using vertical axis counts; CrouterVM, Crouter method using vector magnitudes

**Appendix**  
**Surveillance of Youth Physical Activity and Sedentary Behavior With Wrist Accelerometry**  
**Kim et al.**

**Appendix Figure 2.** Comparisons of five different processing techniques for moderate-to-vigorous physical activity (MVPA) time by gender and age groups.

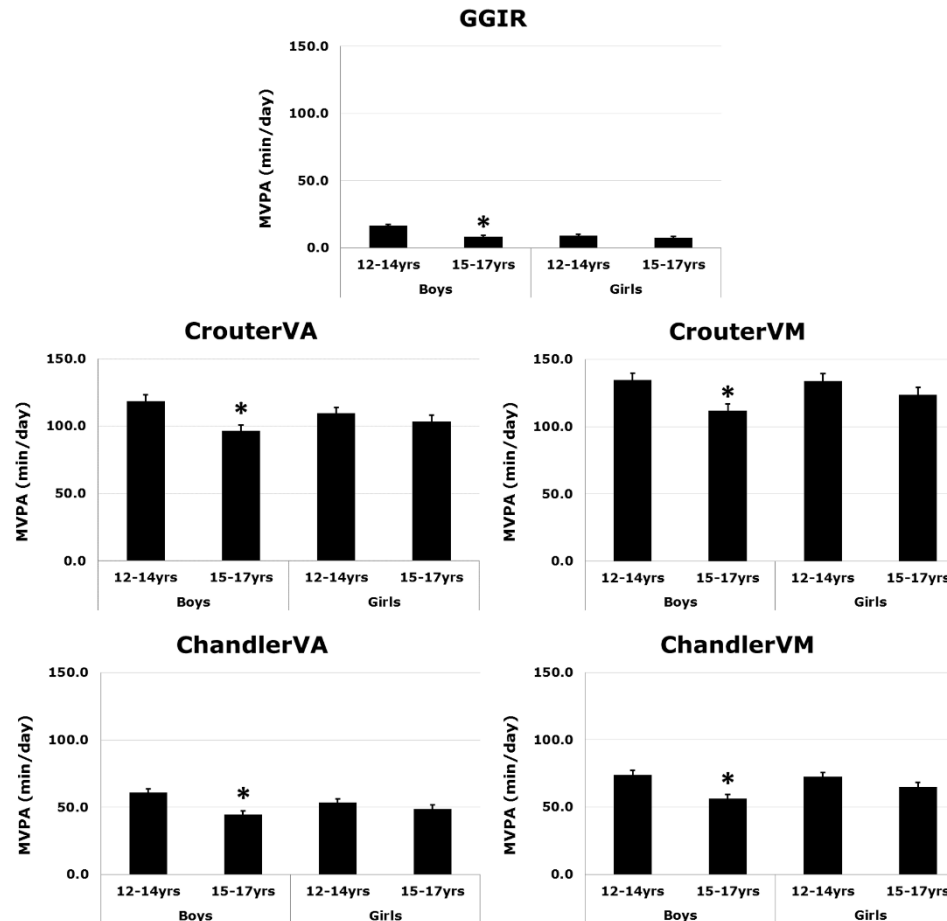

*Note:* An asterisk (\*) indicates significant differences between younger (12-14 years) and older (15-17 years) boys.

ChandlerVA, Chandler method using vertical axis counts; ChandlerVM, Chandler method using vector magnitudes; CrouterVA, Crouter method using vertical axis counts; CrouterVM, Crouter method using vector magnitudes
